1 Title:

2 Evaluation of a Next Generation Sequencing Assay for Hepatitis B Antiviral Drug Resistance on  
3 the Oxford Nanopore System

4

5 Running Title:

6 Evaluation of a NGS Assay for HBV Drug Resistance Testing

7

8 Michael Payne <sup>a b</sup>, Gordon Ritchie <sup>a b</sup>, Tanya Lawson <sup>a</sup>, Matthew Young <sup>a</sup>, Willson Jang <sup>a</sup>,

9 Aleksandra Stefanovic <sup>a b</sup>, Marc G. Romney <sup>a b</sup>, Nancy Matic <sup>a b</sup>, Christopher F. Lowe <sup>a b</sup>

10

11 <sup>a</sup>Division of Medical Microbiology and Virology, St. Paul's Hospital, Providence Health Care,

12 Vancouver, British Columbia, Canada

13 <sup>b</sup>Department of Pathology and Laboratory Medicine, University of British Columbia, Vancouver,

14 British Columbia, Canada

15

16 <sup>#</sup>Corresponding author at: Microbiology Laboratory, St. Paul's Hospital

17 1081 Burrard St, Vancouver, BC, V6Z 1Y6, Canada

18 Email address: [christopher.lowe@ubc.ca](mailto:christopher.lowe@ubc.ca) (C. F. Lowe)

19

20 Key Words:

21 Hepatitis B virus

22 Viral resistance testing

23 Next generation sequencing

24 Molecular methods

25

26 Word Count:1738

27

28 **Abstract**

29

30 Background: Next-generation sequencing (NGS) for Hepatitis B virus (HBV) antiviral resistance  
31 (AVR) testing is a highly sensitive diagnostic method, able to detect low-level mutant  
32 subpopulations. Our clinical virology laboratory previously transitioned from DNA hybridization  
33 (INNO-LiPA) to NGS, initially with the GS Junior System and subsequently the MiSeq. The  
34 Oxford Nanopore Technology (ONT) sequencing system was evaluated for HBV resistance  
35 testing, with regards to sequencing accuracy and turn-around time.

36

37 Methods: We performed amplicon sequencing of the HBV polymerase gene from patient plasma  
38 and external quality assessment (EQA) samples on the MiSeq Reagent Nano Kit v2 and GridION  
39 ONT with R10.4.1 flowcells. Mutational analysis and genotyping were performed by  
40 DeepChekAssay-HBV (version 2.0).

41

42 Results: A total of 49 patient samples and 15 EQA samples were tested on both the MiSeq and  
43 ONT. There was high agreement for both patient and EQA samples between the MiSeq and ONT  
44 systems, with regards to total drug resistance mutations detected and total patient sample  
45 agreement, 68/70 (97%) and 47/49 (96%), respectively.

46

47 Conclusion: The ONT NGS platform provided accurate HBV AVR results, with improved turn-  
48 around times. Sequencing error rates at AVR codons were below 1%.

49

50

51 1. Background

52 Hepatitis B virus (HBV) is an important cause of chronic hepatitis and hepatocellular carcinoma  
53 (HCC) worldwide. Globally, there are an estimated 296 million people living with HBV, along  
54 1.1 million deaths annually (1). Treatment of chronic HBV can decrease the risk of progression  
55 to cirrhosis and HCC. Identification of the HBV genotype, along with antiviral resistance (AVR)  
56 mutations, can help inform the management of chronic HBV infection (2–4). Newer antiviral  
57 agents (Entecavir and Tenofovir) have a higher barrier to AVR mutations and viral  
58 breakthrough; however, AVR testing is useful to monitor for emergence of mutations associated  
59 with decreased virologic response, particularly for patients with previous exposure to HBV  
60 antiviral therapies (3, 5).

61  
62 HBV AVR line probe (LiPA) testing is limited by its inability to detect novel mutations,  
63 hybridization failures, and decreased sensitivity with low viral loads (<1000 IU/mL) (6, 7). In  
64 2014, testing in our clinical laboratory was transitioned to next-generation sequencing (NGS)  
65 with the GS Junior System (454 Life Sciences, Branford, CT) and in 2017, the MiSeq (Illumina)  
66 platform. MiSeq offered increased sequencing depth; however, a shorter read length did not  
67 include all AVR mutation sites (8).

68  
69 The Oxford Nanopore Technology (ONT) sequencing system (GridION ONT) with longer read  
70 capability and updated R10.4.1 flowcells has reported improved error rates, allowing for more  
71 accurate detection of variant subpopulations (9). In addition, this technology has less hands-on  
72 library preparation and sequencing run time, allowing for improved workflow in clinical

73 laboratories. Our study aim was to optimize HBV AVR testing using NGS on the ONT platform,  
74 along with validation of this test for clinical use.

75

76

## 77 2. Materials and Methods

78

79 We used guidance from molecular testing references and draft recommendations from the US  
80 FDA to design this NGS validation study (10–12). Parameters evaluated included: Limit of  
81 detection, inclusivity/accuracy, reproducibility/precision and cross-contamination. DNA was  
82 extracted from samples using the MagNA Pure LC 2.0 (Roche Diagnostics, Mannheim,  
83 Germany) for MiSeq and the MagNA Pure 24 (Roche) for ONT. For both ONT and MiSeq, PCR  
84 primers amplified an 820 base pair (bp) region of the HBV polymerase gene on the Roche  
85 LightCycler® 480. Primer sequence (5' → 3') forward (ILF) CGT GGT GGA CTT CTC TCA  
86 ATT TTC and reverse (ILR) AGA AAG GCC TTG TAA GTT GGC GA. For MiSeq, the second  
87 nested PCR reaction mixture consisted of the first round PCR product, and fusion indexed and  
88 barcoded primers. The nested PCR final amplicon was 364 bp. ONT AVR sequencing was  
89 performed using the GridION with R10.4.1 flow cells and the SQK-NBD114.24 library kit  
90 (Oxford Nanopore Technologies). Guppy (v. 6.4.6) was utilized for sequence base-calling. For  
91 MiSeq and ONT, mutational analysis and genotyping of FASTQ files was performed with  
92 DeepChek® HBV v.2.0 (ABL SA Group). Interpretation of clinically significant AVR mutations  
93 was based on the 2017 EASL Clinical Practice Guidelines (2).

94

95 The 2nd World Health Organization (WHO) International Standard for Hepatitis B Virus DNA  
96 was used for evaluation of the limit of detection for the initial HBV PCR. Serial dilutions of the  
97 WHO Standard were tested with 5 replicates at: 1000, 500, 250, 125, 62.5, and 30 IU/mL. Probit  
98 regression was performed to determine limit of detection.

99  
100 A total of 49 patient samples and 15 external quality assurance (EQA) samples (QCMD,  
101 Glasgow, United Kingdom) were selected for AVR testing by NGS, to include a broad range of  
102 AVR mutations, at varying viral loads and percentage mutation frequency. There were 51 patient  
103 and 35 EQA samples available for genotype testing. The ATCC 45020D plasmid DNA was  
104 utilized as a control in all runs to determine error rates for base calling.

105  
106 To evaluate reproducibility/precision, a well characterized patient sample (genotype C; viral load  
107 of  $9.9 \times 10^8$  IU/mL) was utilized, with mutations at approximately 70%, 51%, 26%, and 7%, at  
108 codons M204I, V173L, L180M, and T184S, respectively. The patient sample was diluted in  
109 Basematrix plasma (Seracare, Milford, MA) to 10,000, 4000, 1000, 250 and 125 IU/mL. These  
110 were tested in 3-5 total replicates over 2 separate NGS runs to determine the reproducibility and  
111 sensitivity of NGS at detecting different percent mutations at various viral loads. In order to  
112 assess cross-contamination risk, each run contained a negative control.

113

### 114 3. Results

115

116 There was a high agreement rate between MiSeq and ONT with regards to total mutations  
117 detected and patient sample agreement, 68/70 (97%) and 47/49 (96%), respectively. All EASL

118 mutations were included in the study, with the exceptions of M250V, N236T and T184G (Table  
119 1) (2).

120  
121 There were two patient samples with a mutation detected only by MiSeq (Table 2). The  
122 discrepant mutation results were found with low viral load samples (<2000 IU/mL). For one  
123 sample, the mutant subpopulation was detected at a low frequency (4.3%, M204I) only on MiSeq  
124 and would not have changed the genotypic resistance interpretation as a M204V mutation was  
125 also detected at a high frequency on both MiSeq and ONT platforms. For the second sample, the  
126 A181T mutation was found on MiSeq at a higher frequency (38%). QCMD samples with known  
127 HBV AVR mutations were tested by MiSeq and ONT. There was 80% (12/15) agreement for  
128 both platforms, with 3 samples having a L80I/V mutation identified only by the ONT platform.  
129 This is a known limitation of the MiSeq assay, as the sequenced amplicon is shorter and does not  
130 cover that particular mutation.

131  
132 There were 35 EQA samples tested with the following genotypes: A, B, C, D, F. All were  
133 identified accurately by MiSeq and ONT. A total of 51 patient samples were tested for genotype  
134 by both MiSeq and ONT, and all results were concordant. These were composed of HBV  
135 genotypes: A (9), B (12), C (22), D (5), E (2), and A/G (1).

136  
137 ONT showed reproducible sequence variant detection for replicates with high viral loads and/or  
138 high-level sequence variants (Table 3). Sequence variant detection showed increased variability  
139 with low viral loads samples (<1000 IU/mL), particularly with low-level frequency  
140 subpopulations (<10%). The limit of detection for the initial PCR was 119 IU/mL. From the

141 plasmid control, average base calling error rates at AVR codons were: V173 (0.74%), L180  
142 (0.84%), M204 (0.36%) and M250 (0.42%). There was no evidence of sample cross-  
143 contamination risk, with each runs negative control testing negative.

144  
145 The ONT assay PCR and library preparation time was approximately 30% less than the MiSeq  
146 assay (5 versus 7 hours for one sample with controls); however, the time required for library  
147 preparation is also dependent on the number of samples included with each sequencing run.  
148 Sequencing time is markedly reduced with the ONT platform: approximately 15-30 minutes for  
149 ONT as compared to 23 hours for MiSeq assay. The time required for bioinformatic analysis for  
150 each sample was comparable between the assays (~15 minutes).

151  
152 4. Discussion

153  
154 This study describes the clinical validation of a NGS HBV AVR assay using the ONT platform.  
155 Results for ONT were highly concordant with MiSeq, with 100% (51/51) accuracy for genotype  
156 and 96% (47/49) accuracy for AVR testing on patient samples. Two samples had an additional  
157 AVR mutation detected by MiSeq which were not detected by ONT. These additional mutations  
158 were detected only on MiSeq from samples with low viral loads (<2000 IU/mL). The increased  
159 detection of low-level subpopulations by the MiSeq assay could be a result of the increased read  
160 depth per run with the MiSeq platform (~12,500) as compared to ONT (~8000). Additionally, the  
161 MiSeq assay used a more sensitive nested PCR for amplicon sequencing, which may explain  
162 improved detection of AVR mutations in low viral load samples. The nested PCR step was  
163 discontinued for the ONT assay, as it was more labour intensive, and had increased risks for



164 sample cross-contamination. In addition, for samples with HBV viral load <500 IU/mL, our  
165 laboratory routinely reports a qualifying comment regarding decreased sensitivity for detecting  
166 mutant subpopulations of <10%, which is consistent with the reproducibility results from Table  
167 3. ONT was able to improve PCR/library preparation and sequencing TAT, which has been  
168 previously demonstrated (13). Using the 45020D plasmid DNA control, which has a known  
169 sequence, ONT sequencing error rates were found to be less than 1% (0.36-0.84%). This is  
170 consistent with error rates reported for the R10.4.1 flow cells (9). Sequencing error rates are  
171 minimized by further quality filtering by Q score and forward/reverse read bias performed during  
172 bioinformatic analysis. This allows for confidence in reporting mutations found at a frequency of  
173 3.5% or greater.

174  
175 Although resistance to antiviral agents is uncommon with entecavir and tenofovir, particularly in  
176 treatment-naïve patients, accessibility to HBV AVR is required for clinical follow up of patients  
177 with virological breakthrough to guide treatment (2–4). While *de novo* resistance to entecavir is  
178 rare, resistance can develop over time with chronic entecavir treatment: 0.9% at  $\geq 5$  years for  
179 treatment naïve and 20.1% for nucleos/tide analogue experienced (14). Limited data exist  
180 regarding tenofovir resistance, though suspected mutations have been reported which were not  
181 described in the EASL guidance (2, 5). In addition to tenofovir, novel antiviral agents aiming for  
182 functional cure are in the pipeline, and AVR sequencing will be needed to provide ongoing  
183 surveillance for any potential novel mutations associated with drug resistance (15, 16).

184  
185 There are practical barriers to the introduction of NGS in clinical laboratories, including cost,  
186 technical expertise and data analysis/interpretation (17, 18). As a clinical laboratory without a

187 dedicated bioinformatician, we utilized a commercial platform to analyze FASTQ sequencing  
188 data and to remove the barrier relating to bioinformatics. Laboratories can also consider other  
189 commercial bioinformatic tools, which may increasingly become available as more laboratories  
190 launch NGS testing programs (19). With developing infrastructure and demand for clinical  
191 sequencing, laboratories may also consider the feasibility of in-house developed bioinformatic  
192 pipelines to enable customization of sequence interpretation, particularly for novel  
193 drugs/mutations (20).

194  
195 Limitations of our study include, despite attempts to include a broad array of AVR mutations and  
196 genotypes (patient and EQA samples), less frequently encountered AVR mutations and  
197 genotypes could not be included. In addition, the clinical relevance of identifying low-level  
198 subpopulations of AVR mutations through NGS is still unclear, and further research is required  
199 to determine relevant thresholds for identification of low-level subpopulations.

200  
201 In conclusion, a single real-time PCR followed by NGS with the ONT platform was found to be  
202 highly accurate for the detection of HBV AVR mutations and HBV genotype testing in a clinical  
203 laboratory. This was consistent across a wide variety of HBV genotypes and resistance  
204 mutations. Benefits of the ONT HBV assay included increased read length, decreased sample  
205 processing time, and improved TAT.

206

207

#### 208 Conflict of Interest

209 No relevant conflict of interests to declare.

210

211 Funding

212 This research did not receive any specific grant from funding agencies in the public, commercial  
213 or not-for-profit sectors.

214

215 Authorship

216 Conceptualization, MP, GR, NM, CFL; Data curation, MP, GR, TL, MY, WJ; Formal analysis,  
217 MP, GR; Sequencing and analysis, GR; Funding acquisition, N/A; Investigation, MP, GR, AS,  
218 MGR, NM, CFL; Methodology, GR, TL, MY; Project administration, WJ, MGR, NM, CFL;  
219 Supervision, NM, CFL; Visualization, MP; Writing – original draft, MP; Writing – review &  
220 editing, MP, GR, TL, MY, WJ, AS, MGR, NM, CFL.

221

222

223 References

- 224 1. World Health Organization. 2024. Guidelines for the prevention, diagnosis, care and  
225 treatment for people with chronic hepatitis B infection.
- 226 2. European Association for the Study of the Liver. 2017. EASL 2017 Clinical Practice  
227 Guidelines on the management of hepatitis B virus infection. *J Hepatol* 67:370–398.
- 228 3. Coffin CS, Fung SK, Alvarez F, Cooper CL, Doucette KE, Fournier C, Kelly E, Ko HH,  
229 Ma MM, Martin SR, Osiowy C, Ramji A, Tam E, Villeneuve JP. 2018. Management of  
230 Hepatitis B Virus Infection: 2018 Guidelines from the Canadian Association for the  
231 Study of Liver Disease and Association of Medical Microbiology and Infectious Disease  
232 Canada. *Can liver J* 1:156–217.
- 233 4. Terrault NA, Lok ASF, McMahon BJ, Chang K-M, Hwang JP, Jonas MM, Brown RSJ,

- 234 Bzowej NH, Wong JB. 2018. Update on Prevention, Diagnosis, and Treatment of Chronic  
235 Hepatitis B: AASLD 2018 Hepatitis B Guidance. *Clin liver Dis* 12:33–34.
- 236 5. Mokaya J, McNaughton AL, Bester PA, Goedhals D, Barnes E, Marsden BD, Matthews  
237 PC. 2020. Hepatitis B virus resistance to tenofovir: fact or fiction? A systematic literature  
238 review and structural analysis of drug resistance mechanisms. *Wellcome open Res.*  
239 *England.*
- 240 6. Solmone M, Vincenti D, Prosperi MCF, Bruselles A, Ippolito G, Capobianchi MR. 2009.  
241 Use of Massively Parallel Ultradeep Pyrosequencing To Characterize the Genetic  
242 Diversity of Hepatitis B Virus in Drug-Resistant and Drug-Naive Patients and To Detect  
243 Minor Variants in Reverse Transcriptase and Hepatitis B S Antigen. *J Virol* 83:1718–  
244 1726.
- 245 7. Qutub MO, Germer JJ, Rebers SPH, Mandrekar JN, Beld MGHM, Yao JDC. 2006.  
246 Simplified PCR protocols for INNO-LiPA HBV Genotyping and INNO-LiPA HBV  
247 PreCore assays. *J Clin Virol Off Publ Pan Am Soc Clin Virol* 37:218–221.
- 248 8. Lowe CL, Merrick L, Harrigan PR, Mazzulli T, Sherlock CH, Ritchie G. 2016. Next-  
249 generation sequencing for hepatitis B genotype and resistance testing in a clinical  
250 microbiology laboratory. *J Clin Microbiol* 54:127–133.
- 251 9. Kim BY, Gellert HR, Church SH, Suvorov A, Anderson SS, Barmina O, Beskid SG,  
252 Comeault AA, Crown KN, Diamond SE, Dorus S, Fujichika T, Hemker JA, Hrcek J,  
253 Kankare M, Katoh T, Magnacca KN, Martin RA, Matsunaga T, Medeiros MJ, Miller DE,  
254 Pitnick S, Simoni S, Steenwinkel TE, Schiffer M, Syed ZA, Takahashi A, Wei KH-C,  
255 Yokoyama T, Eisen MB, Kopp A, Matute D, Obbard DJ, O’Grady PM, Price DK, Toda  
256 MJ, Werner T, Petrov DA. 2023. Single-fly assemblies fill major phylogenomic gaps

- 257 across the Drosophilidae Tree of Life. bioRxiv Prepr Serv Biol. United States.
- 258 10. FDA US. 2016. Infectious disease next generation sequencing based diagnostic devices:  
259 microbial identification and detection of antimicrobial resistance and virulence markers:  
260 draft guidance for industry and Food and Drug Administration staff. U.S. Food and Drug  
261 Administration, Silver Spring, MD.
- 262 11. Burd EM. 2010. Validation of Laboratory-Developed Molecular Assays for Infectious  
263 Diseases. *Clin Microbiol Rev* 23:550–576.
- 264 12. Gargis AS, Kalman L, Lubin M. 2016. Assuring the Quality of Next-Generation  
265 Sequencing in Clinical Microbiology and Public Health Laboratories. *J Clin Microbiol*  
266 54:2857–2865.
- 267 13. Colson P, Boschi C, Bengone-Abogourin JG, Brechard L, Motte A, Allemand I. 2021.  
268 Concurrent Nanopore Next-Generation Sequencing of Hepatitis B and Delta Virus  
269 Genomes Directly From Patient Plasma. *Ann Lab Med. Korea (South)*.
- 270 14. Lumley SF, Delphin M, Mokaya JF, Tan CCS, Martyn E, Anderson M, Li KC, Waddilove  
271 E, Sukali G, Downs LO, Said K, Okanda D, Campbell C, Harriss E, Shimakawa Y,  
272 Matthews PC. 2024. A systematic review and meta-analysis of the risk of hepatitis B virus  
273 (HBV) resistance in people treated with entecavir or tenofovir. *J Clin Virol Off Publ Pan*  
274 *Am Soc Clin Virol* 174:105711.
- 275 15. Wong GLH, Gane E, Lok ASF. 2022. How to achieve functional cure of HBV: Stopping  
276 NUCs, adding interferon or new drug development? *J Hepatol* 76:1249–1262.
- 277 16. Yuen M-F, Lim S-G, Plesniak R, Tsuji K, Janssen HLA, Pojoga C, Gadano A, Popescu  
278 CP, Stepanova T, Asselah T, Diaconescu G, Yim HJ, Heo J, Janczewska E, Wong A, Idriz  
279 N, Imamura M, Rizzardini G, Takaguchi K, Andreone P, Arbune M, Hou J, Park SJ, Vata

- 280 A, Cremer J, Elston R, Lukić T, Quinn G, Maynard L, Kendrick S, Plein H, Campbell F,  
281 Paff M, Theodore D. 2022. Efficacy and Safety of Bepirovirsen in Chronic Hepatitis B  
282 Infection. *N Engl J Med* 387:1957–1968.
- 283 17. Boers SA, Jansen R, Hays JP. 2019. Understanding and overcoming the pitfalls and biases  
284 of next-generation sequencing (NGS) methods for use in the routine clinical  
285 microbiological diagnostic laboratory. *Eur J Clin Microbiol Infect Dis Off Publ Eur Soc*  
286 *Clin Microbiol* 38:1059–1070.
- 287 18. Greninger AL. 2018. The challenge of diagnostic metagenomics. *Expert Rev Mol Diagn*  
288 18:605–615.
- 289 19. Ringlander J, Andersson ME, Prakash K, Larsson SB, Lindh M. 2022. Deep sequencing  
290 of hepatitis B virus using Ion Torrent fusion primer method. *J Virol Methods* 299:114315.
- 291 20. Wang H. 2024. Practical updates in clinical antiviral resistance testing. *J Clin Microbiol*  
292 62:e0072823.
- 293
- 294

295 Table 1 Hepatitis B Antiviral Resistance Mutations Identified by Next Generation Sequencing

| EASL<br>Mutation                     | Number<br>Identified<br>ONT | Number<br>Identified<br>MiSeq |
|--------------------------------------|-----------------------------|-------------------------------|
| M204V                                | 16                          | 16                            |
| M204I                                | 12                          | 13                            |
| L180M                                | 25                          | 25                            |
| A181T/V                              | 1                           | 2                             |
| N236T                                | 0                           | 0                             |
| I169T                                | 1                           | 1                             |
| V173L                                | 7                           | 7                             |
| M250V                                | 0                           | 0                             |
| T184G                                | 0                           | 0                             |
| S202I/G                              | 6                           | 6                             |
| Total<br>Mutations                   | 68                          | 70                            |
| Samples<br>Negative for<br>Mutations | 39                          | 38                            |

296 EASL: European Association for the Study of the Liver

297 NGS: Next-generation sequencing

298 ONT: Oxford Nanopore

299

300

301

302

303

304 Table 2 Discordant Result Analysis

| Sample | Genotype | Viral Load<br>(IU/mL) | ONT            | MiSeq                         |
|--------|----------|-----------------------|----------------|-------------------------------|
| 1      | D        | 1,360                 | L180M<br>M204V | L180M<br>M204V<br>M204I(4.3%) |
| 2      | C        | 1,710                 |                | A181T(38%)                    |

305 ONT: Oxford Nanopore

306

307

308 Table 3 Reproducibility in minority variant analysis with  
 309 decreasing viral loads

| Variant | Viral Load (IU/mL) | ONT      |                          |
|---------|--------------------|----------|--------------------------|
|         |                    | Mean (%) | Coefficient of variation |
| M204I   | 10000              | 70.3     | 7.8                      |
|         | 4000               | 67.7     | 10.8                     |
|         | 1000               | 72.0     | 17.6                     |
|         | 250                | 89.3     | 17.1                     |
|         | 125                | 41.6     | 115.8                    |
| V173L   | 10000              | 50.5     | 7.5                      |
|         | 4000               | 48.2     | 10.1                     |
|         | 1000               | 61.4     | 22.3                     |
|         | 250                | 45.2     | 84.5                     |
|         | 125                | 24.0     | 195.3                    |
| L180M   | 10000              | 25.7     | 21.6                     |
|         | 4000               | 31.7     | 24.8                     |
|         | 1000               | 25.0     | 48.3                     |
|         | 250                | 7.9      | 190.7                    |
|         | 125                | 54.5     | 86.5                     |
| T184S   | 10000              | 6.5      | 16.4                     |
|         | 4000               | 10.3     | 92.7                     |
|         | 1000               | 1.1      | 120.9                    |
|         | 250                | 2.5      | 95.2                     |
|         | 125                | 0.3      | 15.4                     |

310 ONT: Oxford Nanopore

311

312

313
